# Supplementary material
Source: ML conference proceedings conference paper supplement (https://openreview.net/forum?id=2NqIV8dzR7N)
Supplement: supplementary_material [file attachment]

## A SUPPLEMENTARY MATERIAL

### Automatic Termination for Hyperparameter Optimization

#### A.1 PROOF OF PROPOSITION 1

**Proposition 1.** Consider the expected loss  $f$  and its estimator  $\hat{f}$  defined in Eqs. (4) and (5), respectively, and assume the statistical error of the estimator is bounded as  $\|\hat{f} - f\|_\infty \leq \epsilon_{st}$ . Let  $\gamma^* = \arg \min_{\gamma \in \Gamma} f(\gamma)$ ,  $\gamma_D^* = \arg \min_{\gamma \in \Gamma} \hat{f}(\gamma)$ , and  $\hat{\gamma}_D$  be a candidate solution to  $\min_{\gamma \in \Gamma} \hat{f}(\gamma)$  such that  $\hat{f}(\hat{\gamma}_D) - \hat{f}(\gamma_D^*) \leq \epsilon_{BO}$  for some  $\epsilon_{BO} \geq 0$ . Then the gap in generalization performance  $f(\hat{\gamma}_D) - f(\gamma^*)$  between the proposed solution and the true optimizer can be bounded as follows:

$$\begin{aligned} f(\hat{\gamma}_D) - f(\gamma^*) &\leq \underbrace{f(\hat{\gamma}_D) - \hat{f}(\hat{\gamma}_D)}_{\leq \epsilon_{st}} + \underbrace{\hat{f}(\hat{\gamma}_D) - \hat{f}(\gamma_D^*)}_{\leq \epsilon_{BO}} + \underbrace{\hat{f}(\gamma_D^*) - \hat{f}(\gamma^*)}_{\leq 0} + \underbrace{\hat{f}(\gamma^*) - f(\gamma^*)}_{\leq \epsilon_{st}} \\ &\leq 2\epsilon_{st} + \epsilon_{BO}. \end{aligned}$$

Moreover, without further restrictions on  $f$ ,  $\hat{f}$ ,  $\hat{\gamma}_D$  and  $\gamma^*$ , this upper bound is tight. (Proof in

*Proof:* While the second inequality is due to the definition of  $\hat{\gamma}_D$ , the others can be proved as follows:

$$\begin{aligned} f(\hat{\gamma}_D) - \hat{f}(\hat{\gamma}_D) &\leq |f(\hat{\gamma}_D) - \hat{f}(\hat{\gamma}_D)| \leq \max_{\gamma \in \Gamma} |f(\gamma) - \hat{f}(\gamma)| = \|\hat{f} - f\|_\infty \leq \epsilon_{st}, \\ \gamma_D^* = \arg \min_{\gamma \in \Gamma} \hat{f}(\gamma) &\longrightarrow \forall \gamma \in \Gamma : \hat{f}(\gamma_D^*) - \hat{f}(\gamma) \leq 0 \longrightarrow \hat{f}(\gamma_D^*) - \hat{f}(\gamma^*) \leq 0. \blacksquare \end{aligned}$$

#### A.2 EXPERIMENTS SETTING

##### A.2.1 BO SETTING

We used an internal BO implementation where expected improvement (EI) together with Mat’ern-5/2 kernel in the GP are used. The hyperparameters of the GP includes output noise, a scalar mean value, bandwidths for every input dimension, 2 input warping parameters and a scalar covariance scale parameter. The closest open-source implementations are GPyOpt using input warped GP [1] or AutoGluon BayesOpt searcher [2]. We maximize type II likelihood to learn the GP hyperparameters in our experiments.

##### A.2.2 ALGORITHM

##### A.2.3 SEARCH SPACES FOR CROSS VALIDATION EXPERIMENTS

XGBoost (XGB) and RandomForest (RF) are based on scikit-learn implementations and their search spaces are listed in Table 1.

##### A.2.4 DATASETS IN CROSS VALIDATION EXPERIMENTS

We list the datasets that are used in our experiments, as well as their characteristics and sources in Table 2. For each dataset, we first randomly draw 20% as test set and for the rest, we use 10-fold cross validations for regression datasets and 10-fold stratified cross validation for classification datasets. The actual data splits depend on the seed controlled in our experiments. For a given experiment, all the hyperparameters trainings use the same data splits for the whole tuning problem. For the experiments without cross-validation, we use 20% dataset as validation set and the rest as training set.

#### A.3 DETAILED RESULTS

We first show the scatter plots of RTC and RYC scores for different automatic termination methods on HPO-Bench-datasets in Fig. 6 and the results on NAS-Bench-201 in Fig. 7.

<https://github.com/SheffieldML/GPyOpt>  
<https://github.com/awsml/autogluon>

**Algorithm 1** BO for HPO with cross-validation and automatic termination

---

**Require:** Model  $\mathcal{M}_\gamma$  parametrized by  $\gamma \in \Gamma$ , data  $\{\mathcal{D}_1, \dots, \mathcal{D}_k\}$  for  $k$ -fold cross-validation, acquisition function  $\alpha(\gamma)$

- 1: Initialize  $y_t^* = +\infty$  and  $G_t = \{\}$
- 2: **for**  $t = 1, 2, \dots$  **do**
- 3:   Sample  $\gamma_t \in \arg \max_{\gamma \in \Gamma} \alpha(\gamma)$
- 4:   **for**  $i = 1, 2, \dots, k$  **do**
- 5:     Fit the model  $\mathcal{M}_\gamma(\cdot; \mathcal{D}_{-i})$ , where  $\mathcal{D}_{-i} = \cup_{j \neq i} \mathcal{D}_j$
- 6:     Evaluate the fitted model  $y_t^i = \frac{1}{|\mathcal{D}_i|} \sum_{\mathbf{x}_i, \mathbf{y}_i \in \mathcal{D}_i} \ell(\mathbf{y}_i, \mathcal{M}_\gamma(\mathbf{x}_i, \mathcal{D}_{-i}))$
- 7:   **end for**
- 8:   Calculate the sample mean  $y_t = \frac{1}{k} \sum_k y_t^i$ ,
- 9:   **if**  $y_t \leq y_t^*$  **then**
- 10:     Update  $y_t^* = y_t$  and the current best  $\gamma_t^* = \gamma_t$
- 11:     Calculate the sample variance  $s_{cv}^2 = \frac{1}{k} \sum_i (y_t - y_t^i)^2$
- 12:     Calculate the variance estimate  $\text{Var} \hat{f}(\gamma_t^*) \approx \left( \frac{1}{k} + \frac{|\mathcal{D}_i|}{|\mathcal{D}_{-i}|} \right) s_{cv}^2$  from Eq. (8)
- 13:   **end if**
- 14:   Update  $G_t = G_{t-1} \cup \gamma_t$  and  $y_{1:t} = y_{1:t-1} \cup y_t$
- 15:   Update  $\sigma_t, \mu_t$  with Eqs. (1) and (2)
- 16:   Calculate upper bound  $\bar{r}_t := \min_{\gamma \in G_t} \text{ucb}_t(\gamma) - \min_{\gamma \in \Gamma} \text{lcb}_t(\gamma)$  for simple regret from Eq. (7)
- 17:   **if** the condition  $\bar{r}_t \leq \sqrt{\text{Var} \hat{f}(\gamma_t^*)}$  holds **then**
- 18:     **terminate BO loop**
- 19:   **end if**
- 20: **end for**
- 21: **Output:**  $\gamma_t^*$

---

Table 1: Search spaces description for each algorithm.

| tasks        | hyperparameter    | search space     | scale  |
|--------------|-------------------|------------------|--------|
| XGBoost      | n_estimators      | $[2, 2^9]$       | log    |
|              | learning_rate     | $[10^{-6}, 1]$   | log    |
|              | gamma             | $[10^{-6}, 2^6]$ | log    |
|              | min_child_weight  | $[10^{-6}, 2^5]$ | log    |
|              | max_depth         | $[2, 2^5]$       | log    |
|              | subsample         | $[0.5, 1]$       | linear |
|              | colsample_bytree  | $[0.3, 1]$       | linear |
|              | reg_lambda        | $[10^{-6}, 2]$   | log    |
|              | reg_alpha         | $[10^{-6}, 2]$   | log    |
| RandomForest | n_estimators      | $[1, 2^8]$       | log    |
|              | min_samples_split | $[0.01, 0.5]$    | log    |
|              | max_depth         | $[1, 5]$         | log    |

## A.3.1 DETAILED NUMBERS OF RYC AND RTC SCORES

We report detailed RYC scores and RTC scores of different HPO automatic termination methods for the experiments in the main text in Table 3, Table 4 and Table 5

## A.3.2 CORRELATION BETWEEN VALIDATION AND TEST METRICS

In Fig. 8 we show the correlation between validation and test metrics of hyperparameters when tuning XGB and RF on tst-census dataset in Fig. 8

| dataset             | problem_type   | n_rows | n_cols | n_classes | source   |
|---------------------|----------------|--------|--------|-----------|----------|
| openml14            | classification | 1999   | 76     | 10        | openml   |
| openml20            | classification | 1999   | 240    | 10        | openml   |
| tst-hate-crimes     | classification | 2024   | 43     | 63        | data.gov |
| openml-9910         | classification | 3751   | 1776   | 2         | openml   |
| farmads             | classification | 4142   | 4      | 2         | uci      |
| openml-3892         | classification | 4229   | 1617   | 2         | openml   |
| sylvine             | classification | 5124   | 21     | 2         | openml   |
| op100-9952          | classification | 5404   | 5      | 2         | openml   |
| openml28            | classification | 5619   | 64     | 10        | openml   |
| philippine          | classification | 5832   | 309    | 2         | data.gov |
| fabert              | classification | 8237   | 801    | 2         | openml   |
| openml32            | classification | 10991  | 16     | 10        | openml   |
| openml34538         | regression     | 1744   | 43     | -         | openml   |
| tst-census          | regression     | 2000   | 44     | -         | data.gov |
| openml405           | regression     | 4449   | 202    | -         | openml   |
| tmdb-movie-metadata | regression     | 4809   | 22     | -         | kaggle   |
| openml503           | regression     | 6573   | 14     | -         | openml   |
| openml558           | regression     | 8191   | 32     | -         | openml   |
| openml308           | regression     | 8191   | 32     | -         | openml   |

Table 2: Datasets used in our experiments including their characteristics and sources.

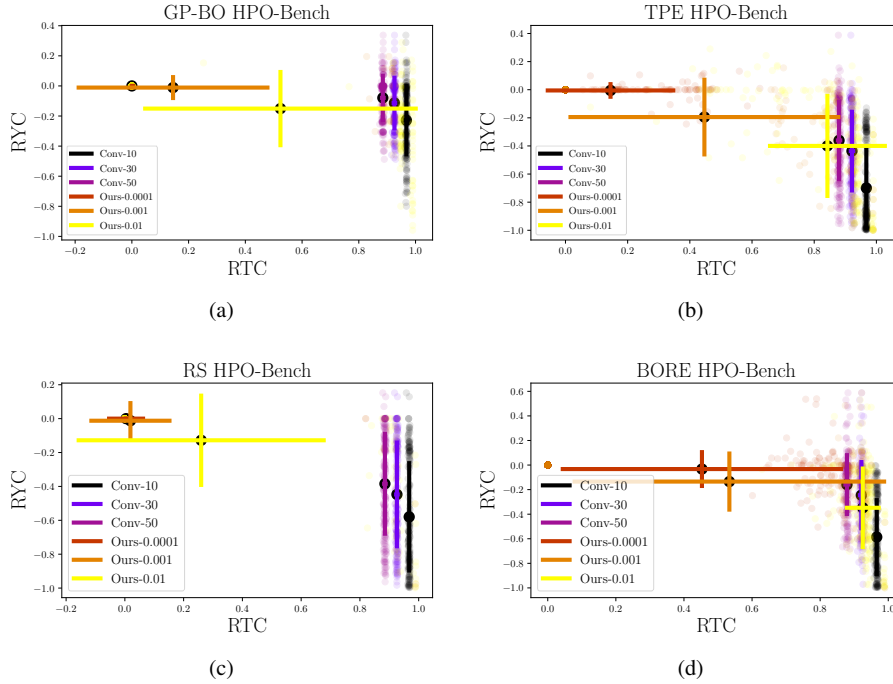

Figure 6: Fig. (a) - (d), the mean and standard deviation of RYC and RTC scores for considered automatic termination methods on HPO-Bench datasets using GP based BO (GP-BO), Random Search (RS), TPE and BORE optimizers. The mean value is shown in the big dot and the standard deviation is shown as error bar in both dimensions.

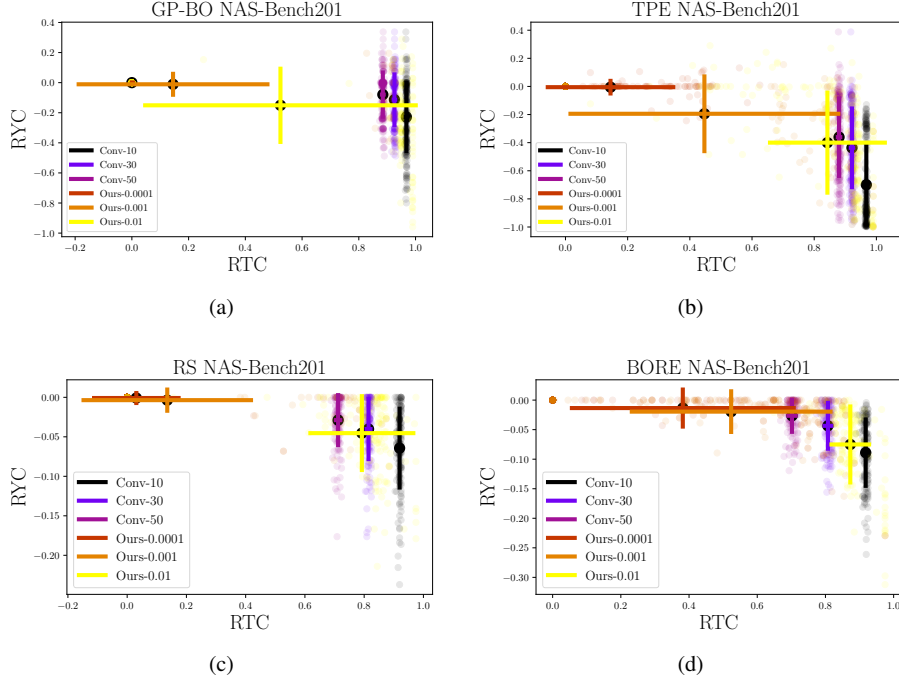

Figure 7: Fig. (a) - (d), the mean and standard deviation of RYC and RTC scores for considered automatic termination methods on NAS-Bench-201 datasets using GP based BO (GP-BO), Random Search (RS), TPE and BORE optimizers. The mean value is shown in the big dot and the standard deviation is shown as error bar in both dimensions.

| algo      | RTC   |       | RYC    |        |
|-----------|-------|-------|--------|--------|
|           | RF    | XGB   | RF     | XGB    |
| Conv_10   | 0.840 | 0.841 | -0.031 | -0.051 |
| Conv_30   | 0.686 | 0.666 | -0.022 | -0.026 |
| Conv_50   | 0.498 | 0.504 | -0.015 | -0.021 |
| EI_1e-08  | 0.896 | 0.850 | -0.057 | -0.052 |
| EI_1e-12  | 0.895 | 0.779 | -0.055 | -0.047 |
| EI_1e-16  | 0.893 | 0.718 | -0.052 | -0.045 |
| PI_0.0001 | 0.898 | 0.875 | -0.059 | -0.059 |
| PI_1e-08  | 0.895 | 0.814 | -0.055 | -0.052 |
| PI_1e-12  | 0.894 | 0.739 | -0.055 | -0.044 |
| Ours_0.21 | 0.318 | 0.144 | -0.004 | -0.003 |
| Ours_0.5  | 0.580 | 0.224 | -0.013 | -0.006 |

Table 3: RTC and RYC scores for early stopping methods in cross validation benchmarks.

| dataset     | RTC   |            |         |       | RYC    |            |         |        |
|-------------|-------|------------|---------|-------|--------|------------|---------|--------|
|             | naval | parkinsons | protein | slice | naval  | parkinsons | protein | slice  |
| Conv_10     | 0.943 | 0.947      | 0.946   | 0.942 | -0.605 | -0.582     | -0.117  | -0.432 |
| Conv_30     | 0.826 | 0.837      | 0.837   | 0.840 | -0.064 | -0.235     | -0.021  | -0.119 |
| Conv_50     | 0.748 | 0.729      | 0.734   | 0.747 | -0.038 | -0.107     | -0.008  | -0.058 |
| Ours_0.0001 | 0.790 | 0.018      | 0.198   | 0.822 | -0.041 | -0.012     | -0.005  | -0.072 |
| Ours_0.001  | 0.910 | 0.038      | 0.271   | 0.934 | -0.220 | -0.031     | -0.018  | -0.281 |
| Ours_0.01   | 0.941 | 0.901      | 0.906   | 0.953 | -0.498 | -0.378     | -0.071  | -0.466 |

Table 4: RTC and RYC scores for early stopping methods in HPO-Bench.

| dataset     | ImageNet | RTC     |          | ImageNet | RYC     |          |
|-------------|----------|---------|----------|----------|---------|----------|
|             |          | cifar10 | cifar100 |          | cifar10 | cifar100 |
| Conv_10     | 0.880    | 0.889   | 0.888    | -0.034   | -0.098  | -0.097   |
| Conv_30     | 0.612    | 0.611   | 0.606    | -0.010   | -0.019  | -0.036   |
| Conv_50     | 0.372    | 0.361   | 0.372    | -0.004   | -0.006  | -0.014   |
| Ours_0.0001 | 0.274    | 0.311   | 0.519    | -0.002   | -0.008  | -0.026   |
| Ours_0.001  | 0.377    | 0.622   | 0.582    | -0.005   | -0.023  | -0.033   |
| Ours_0.01   | 0.837    | 0.902   | 0.879    | -0.022   | -0.106  | -0.099   |

Table 5: RTC and RYC scores for early stopping methods in NAS-Bench-201.

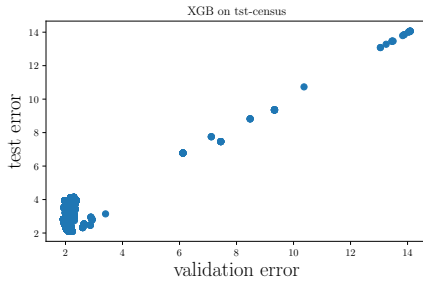

(a) Training XGB on test-census dataset

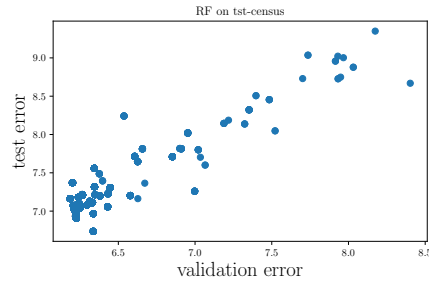

(b) Training RF on test-census dataset.

Figure 8: We show validation error for training XGB (a) and RF (b) on `tst-census` dataset on the  $x$ -axis and test error on the  $y$ -axis. In the *low* error region, the validation metrics are not well correlated with the test metrics.
